# Supplementary material for: Genome-wide identification and phenotypic characterization of seizure-associated copy number variations in 741,075 individuals
Source: PubMed Central journal article supplement (PMC10359300; doi:10.1038/s41467-023-39539-6), 2023-07-20
Supplement: 41467_2023_39539_MOESM1_ESM.pdf [file 41467_2023_39539_MOESM1_ESM.pdf]

# Genome-wide identification and phenotypic characterization of seizure-associated copy number variations in 741,075 individuals.

## SUPPLEMENTARY MATERIAL

### SUPPLEMENTARY TABLES

**Supplementary Table 1:** List of cohorts for which CNV calls were made.

| Cohort                                               | Data Source                          | Short Name                       | Citation                                      | Original Ref. Build | Case Phenotypes         | Cases   | Controls                                                                      | Meta-analysis cohort assignment |
|------------------------------------------------------|--------------------------------------|----------------------------------|-----------------------------------------------|---------------------|-------------------------|---------|-------------------------------------------------------------------------------|---------------------------------|
| <b>Epi25 Collaborative cohort</b>                    | Epi25 Collaborative                  | Epi25                            | Epi25 Collaborative, Am J Hum Genet (2021)    | hg19                | Epilepsy and controls   | 16,109  | 8,545                                                                         | NA                              |
| <b>Neuropsychiatric cohort</b>                       | BioVU                                | BioVU                            | Morley et al., Nat. Med. (2021)               | hg19                | Mixed                   | 32,306  | 14,661                                                                        | Cohort 7                        |
|                                                      | Boston Children's Hospital           | BCH                              | Talkowski et al., Cell (2012)                 | hg18                | Mixed                   | 3,591   | 0                                                                             | Cohort 1                        |
|                                                      | Children's Hospital of Philadelphia  | CHOP                             | Li et al., Nat. Commun. (2020)                | hg19                | Mixed                   | 153,870 | 24,161                                                                        | Cohort 4                        |
|                                                      | Eichler Lab                          | Coe                              | Coe et al., Nat. Genet. (2014)                | hg19                | Developmental disorders | 29,104  | 11,256                                                                        | Cohort 1                        |
|                                                      | Eichler Lab                          | Cooper                           | Cooper et al., Nat. Genet. (2011)             | hg19                | N/A                     | 0       | 8,329                                                                         | Cohort 1                        |
|                                                      | Estonian Biobank                     | EstBB                            | Leitsalu et al., Int. J. Epidemiol. (2014)    | hg19                | Mixed                   | 63,183  | 15,659                                                                        | Cohort 6                        |
|                                                      | GeneDX                               | GDX                              | -                                             | hg18 & 19           | Mixed                   | 74,028  | 0                                                                             | Cohort 2                        |
|                                                      | Indiana University                   | IU                               | -                                             | hg19                | Mixed                   | 1,577   | 0                                                                             | Cohort 1                        |
|                                                      | Ontario Population Genomics Platform | Ontario                          | Uddin et al., Genet. Med. (2015)              | hg19                | N/A                     | 0       | 873                                                                           | Cohort 2                        |
|                                                      | Psychiatric Genetics Consortium      | PGC                              | Marshall et al., Nat. Genet. (2017)           | hg18                | Schizophrenia           | 21,094  | 20,277                                                                        | Cohort 3                        |
|                                                      | Radboud University Medical Center    | RUMC                             | Vulto-van Silfhout et al., Hum. Mutat. (2013) | hg17                | Intellectual disability | 5,531   | 0                                                                             | Cohort 3                        |
|                                                      | SickKids Hospital                    | SickKids                         | Zarrei et al., NPJ Genomic Medicine (2019)    | hg19                | Developmental disorders | 2,689   | 0                                                                             | Cohort 3                        |
|                                                      | Simons Simplex Collection            | SSC                              | Sanders et al., Neuron (2015)                 | hg18                | Autism                  | 2,795   | 0                                                                             | Cohort 3                        |
|                                                      | The Cancer Genome Atlas              | TCGA                             | Zack et al., Nat. Genet. (2013)               | hg19                | N/A                     | 0       | 8,670                                                                         | Cohort 3                        |
| The Genetic Etiology of Tourette Syndrome Consortium | TSAICG                               | Huang et al., Neuron (2017)      | hg19                                          | Tourette Syndrome   | 2,434                   | 4,093   | Cohort 2                                                                      |                                 |
| UK Biobank                                           | UKBB                                 | Macé et al., Nat. Commun. (2017) | hg19                                          | Mixed               | 54,071                  | 375,800 | Cohort 2 (3,139 randomly selected controls); Cohort 5 (all remaining samples) |                                 |
| <b>Phenomic Cohort</b>                               | Epi25 Collaborative                  | Pheno-Epi25                      | Epi25 Collaborative, Am J Hum Genet (2021)    | hg19                | Non-acquired epilepsy   | 10,880  | 0                                                                             | NA                              |

The phenomic cohort is a subset of the Epi25 cohort.

**Supplementary Table 2:** Phenotypes of neuropsychiatric disorders cohorts used in this study.

| <b>Disorder Full Name</b>                                 | <b>N</b> | <b>HPO</b> |
|-----------------------------------------------------------|----------|------------|
| Seizures                                                  | 10,590   | HP:0001250 |
| <b>Considered 23 neuropsychiatric disorders</b>           |          |            |
| Abnormality of the nervous system                         | 248,751  | HP:0000707 |
| Abnormality of higher mental function                     | 15,416   | HP:0011446 |
| Neurodevelopmental abnormality                            | 55,760   | HP:0012759 |
| Autistic behavior                                         | 26,199   | HP:0000729 |
| Intellectual disability                                   | 10,371   | HP:0001249 |
| Behavioral abnormality                                    | 135,483  | HP:0000708 |
| Impairment in personality functioning                     | 58,323   | HP:0031466 |
| Hyperactivity                                             | 14,955   | HP:0000752 |
| Bipolar affective disorder                                | 34,915   | HP:0007302 |
| Schizophrenia                                             | 25,108   | HP:0100753 |
| Abnormal fear/anxiety-related behavior                    | 25,856   | HP:0100852 |
| Sleep disturbance                                         | 6,091    | HP:0002360 |
| Abnormality of nervous system morphology                  | 68,594   | HP:0012639 |
| Morphological abnormality of the central nervous system   | 37,800   | HP:0002011 |
| Abnormality of brain morphology                           | 7,688    | HP:0012443 |
| Atrophy/Degeneration affecting the central nervous system | 26,163   | HP:0007367 |
| Abnormality of central motor function                     | 5,341    | HP:0011442 |
| Abnormality of movement                                   | 12,628   | HP:0100022 |
| CNS hypermyelination                                      | 3,204    | HP:0012447 |
| Involuntary movements                                     | 4,928    | HP:0004305 |
| Abnormality of the peripheral nervous system              | 6,005    | HP:0410008 |
| Abnormal peripheral nervous system morphology             | 32,665   | HP:0000759 |
| Peripheral neuropathy                                     | 22,571   | HP:0009830 |

In column 1, the Human Phenotype Ontology code of the considered disorder is reported along with the full name. In the last column the number of individuals with the specific disorder are reported.

**Supplementary Table 3:** The percentage of 10,880 Epi25 participants included in the phenomic analysis cohort annotated with a clinically-prioritized selection of common epilepsy phenotypes. The full list of phenotype frequencies is available in Supplementary Data 4.

| <b>HPO id</b> | <b>HPO name</b>                                 | <b>Number of annotated individuals</b> | <b>Percentage of annotated individuals</b> |
|---------------|-------------------------------------------------|----------------------------------------|--------------------------------------------|
| HP:0001250    | Seizure                                         | 10869                                  | 99.9                                       |
| HP:0002353    | EEG abnormality                                 | 9127                                   | 83.9                                       |
| HP:0007359    | Focal-onset seizure                             | 6991                                   | 64.3                                       |
| HP:0002069    | Bilateral tonic-clonic seizure                  | 5772                                   | 53.1                                       |
| HP:0011146    | Dialectic seizure                               | 5608                                   | 51.5                                       |
| HP:0011185    | EEG with focal epileptiform discharges          | 4987                                   | 45.8                                       |
| HP:0033259    | Non-motor seizure                               | 3959                                   | 36.4                                       |
| HP:0011198    | EEG with generalized epileptiform discharges    | 3924                                   | 36.1                                       |
| HP:0002384    | Focal impaired awareness seizure                | 3866                                   | 35.5                                       |
| HP:0002197    | Generalized-onset seizure                       | 3786                                   | 34.8                                       |
| HP:0012443    | Abnormality of brain morphology                 | 3695                                   | 34.0                                       |
| HP:0033717    | EEG with temporal epileptiform discharges       | 3489                                   | 32.1                                       |
| HP:0007334    | Bilateral tonic-clonic seizure with focal onset | 3168                                   | 29.1                                       |
| HP:0032677    | Generalized-onset motor seizure                 | 2931                                   | 26.9                                       |
| HP:0020174    | Refractory drug response                        | 2658                                   | 24.4                                       |
| HP:0012759    | Neurodevelopmental abnormality                  | 1895                                   | 17.4                                       |

EEG = electroencephalogram.

**Supplementary Table 4:** CNV frequencies in the cases & controls of the meta-analysis, DGV-Gold Standard, and DECIPHER databases.

| Cytoband      | CNV type | Hg19 Start (Mb) | Hg19 End (Mb) | Cases carrier frequency [%] | Control carrier frequency [%] | Frequency in DGV Gold Standard [%] | Frequency in DECIPHER [%] |
|---------------|----------|-----------------|---------------|-----------------------------|-------------------------------|------------------------------------|---------------------------|
| 1p36.33       | DEL      | 0.91            | 1.51          | 0.086                       | 0.015                         | 0                                  | 0                         |
| 1p36.33       | DEL      | 2.02            | 2.49          | 0.146                       | 0.003                         | 0                                  | 0                         |
| 1q44          | DEL      | 245.29          | 245.86        | 0.041                       | 0.002                         | 0                                  | 0                         |
| 2p21-p16.3    | DEL      | 47.5            | 47.85         | 0.678                       | 0.002                         | 0                                  | 0                         |
| 2q13          | DUP      | 110.77          | 111.06        | 0.139                       | 0.108                         | 0                                  | 0.27                      |
| 3q29          | DEL      | 195.76          | 196.24        | 0.034                       | 0.002                         | 0                                  | 0.12                      |
| 8p23.3-p23.2  | DEL      | 0.4             | 5.47          | 0.067                       | 0.010                         | 0                                  | 0                         |
| 9p24.3        | DEL      | 0.33            | 0.56          | 0.049                       | 0.007                         | 0                                  | 0.02                      |
| 9q34.3        | DUP      | 139.21          | 140.12        | 0.315                       | 0.003                         | 0                                  | 0                         |
| 10q26.3       | DEL      | 133.41          | 134.68        | 0.030                       | 0.002                         | 0                                  | 0                         |
| 15q11.2       | DEL      | 22.74           | 23.28         | 0.689                       | 0.284                         | 0.41                               | 0.83                      |
| 15q11.2-q13.3 | DUP      | 22.98           | 32.15         | 0.258                       | 0.005                         | 0                                  | 0.12                      |
| 15q12-q13.1   | DEL      | 27.93           | 28.23         | 0.097                       | 0.008                         | 0                                  | 0                         |
| 15q13.2-q13.3 | DEL      | 31.06           | 32.51         | 0.243                       | 0.012                         | 0                                  | 0.02                      |
| 16p13.3       | DUP      | 0.6             | 0.89          | 0.573                       | 0.009                         | 0                                  | 0                         |
| 16p13.11      | DEL      | 15.42           | 16.35         | 0.363                       | 0.031                         | 0.03                               | 0.07                      |
| 16p12.2       | DEL      | 21.88           | 22.5          | 0.191                       | 0.054                         | 0.09                               | 0.08                      |
| 16p11.2       | DEL      | 29.56           | 30.19         | 0.165                       | 0.024                         | 0.05                               | 0.12                      |
| 16p11.2       | DUP      | 29.87           | 30.19         | 0.127                       | 0.026                         | 0                                  | 0.03                      |
| 17q12         | DUP      | 34.76           | 36.25         | 0.187                       | 0.014                         | 0.02                               | 0.12                      |
| 17q21.31      | DEL      | 41.08           | 41.45         | 0.461                       | 0.004                         | 0                                  | 0                         |
| 19p13.3       | DUP      | 1.04            | 1.34          | 0.427                       | 0.003                         | 0                                  | 0.08                      |
| 20q13.33      | DUP      | 62              | 62.35         | 0.479                       | 0.006                         | 0                                  | 0                         |
| 22q11.21      | DUP      | 18.99           | 21.54         | 0.199                       | 0.067                         | 0                                  | 0                         |
| 22q11.21      | DEL      | 18.99           | 21.54         | 0.120                       | 0.009                         | 0                                  | 0.19                      |

The frequencies in the DGV Gold Standard and DECIPHER Population databases are given for CNVs with  $\geq 50\%$  overlap with the seizure-associated CNV regions.

**Supplementary Table 5:** Resources used to collect information about CNVs and the affected genes.

| Name                                     | Web address                                                                                                               | Used for                                                                                                 |
|------------------------------------------|---------------------------------------------------------------------------------------------------------------------------|----------------------------------------------------------------------------------------------------------|
| DGV                                      | <a href="http://dgv.tcag.ca/dgv/app/downloads?ref=">http://dgv.tcag.ca/dgv/app/downloads?ref=</a>                         | Annotation of CNV frequencies from external data                                                         |
| DECIPHER                                 | <a href="https://www.deciphergenomics.org/about/downloads/data">https://www.deciphergenomics.org/about/downloads/data</a> | Localization of reported phenotypes, curated genes, dosage sensitivity                                   |
|                                          | <a href="https://www.deciphergenomics.org">https://www.deciphergenomics.org</a>                                           | Reported CNV Syndromes                                                                                   |
| ClinGen                                  | <a href="https://www.clinicalgenome.org">https://www.clinicalgenome.org</a>                                               | Localization of reported phenotypes, curated genes, dosage sensitivity                                   |
| GARD                                     | <a href="https://rarediseases.info.nih.gov">https://rarediseases.info.nih.gov</a>                                         | Detailed phenotypes of disorders caused by CNVs or genes overlapping with the seizure-associated regions |
| OMIM                                     | <a href="https://www.omim.org">https://www.omim.org</a>                                                                   | Molecular Genetics and reported patients for any gene                                                    |
| PubMed                                   | <a href="https://pubmed.ncbi.nlm.nih.gov">https://pubmed.ncbi.nlm.nih.gov</a>                                             | Screening of published literature                                                                        |
| UCSC Genome Browser on Human GRCh37/hg19 | <a href="https://genome.ucsc.edu/">https://genome.ucsc.edu/</a>                                                           | Visualization of the credible intervals                                                                  |
| GWAS Catalog                             | <a href="https://www.ebi.ac.uk/gwas/home">https://www.ebi.ac.uk/gwas/home</a>                                             | Reported GWAS hits in credible intervals                                                                 |
| Enrichr                                  | <a href="https://maayanlab.cloud/Enrichr/">https://maayanlab.cloud/Enrichr/</a>                                           | Pathway analyses                                                                                         |

**Supplementary Table 6:** List of modifications to the HPO (version released 2022-02-14).

| HPO id     | HPO name                           | Rationale for exclusion or modified use                                                                                                                                                                                                                                                                                                                                                                                                                                                                                                                                                  |
|------------|------------------------------------|------------------------------------------------------------------------------------------------------------------------------------------------------------------------------------------------------------------------------------------------------------------------------------------------------------------------------------------------------------------------------------------------------------------------------------------------------------------------------------------------------------------------------------------------------------------------------------------|
| HP:0000001 | All                                | Excluded as ubiquitous after propagation in this cohort.                                                                                                                                                                                                                                                                                                                                                                                                                                                                                                                                 |
| HP:0000118 | Phenotypic abnormality             | Excluded as ubiquitous after propagation in this cohort.                                                                                                                                                                                                                                                                                                                                                                                                                                                                                                                                 |
| HP:0000707 | Abnormality of the nervous system  | Excluded as ubiquitous after propagation in this cohort.                                                                                                                                                                                                                                                                                                                                                                                                                                                                                                                                 |
| HP:0012638 | Abnormal nervous system physiology | Excluded as ubiquitous after propagation in this cohort.                                                                                                                                                                                                                                                                                                                                                                                                                                                                                                                                 |
| HP:0020174 | Refractory drug response           | Made child of Phenotypic abnormality [HP:0000118] only because in the context of this analysis, we do not consider this to be a form an Abnormality of metabolism/homeostasis [HP:0001939]. Abnormal drug response [HP:0020169] was excluded from this modification because no individual was annotated with this without also being annotated with Refractory drug response [HP:0020174], making the former uninformative relative to the latter.                                                                                                                                       |
| HP:0033349 | Seizure cluster                    | Made child of Seizure [HP:0001250] only as a description of a phenotypic feature of seizures.                                                                                                                                                                                                                                                                                                                                                                                                                                                                                            |
| HP:0040006 | Mortality/aging                    | We used this term to code those individuals who were recorded as deceased.                                                                                                                                                                                                                                                                                                                                                                                                                                                                                                               |
| HP:0001699 | Sudden death                       | Made child of Mortality/Aging [HP:0040006] only, a term we used to code those individuals who were recorded as deceased. Sudden unexpected death in epilepsy [HP:0033258] remained a child of Sudden death [HP:0001699].                                                                                                                                                                                                                                                                                                                                                                 |
| HP:0025142 | Constitutional symptom             | Only very few individuals were annotated with types of Constitutional symptom [HP:0025142] (Fatigue [HP:0012378] in two and Myalgia [HP:0003326] in one), which we consider to be a sign of gross underreporting given the frequency of these in the general population. Hence, we omitted the term Constitutional symptom [HP:0025142] to avoid overweighting of the similarity between what are phenotypically only loosely related symptoms, making Fatigue [HP:0012378] and Pain [HP:0012531] (parent of Myalgia [HP:0003326]) children of Phenotypic abnormality [HP:0000118] only. |
| HP:0002372 | Normal interictal EEG              | While the absence of electroencephalographic abnormalities can be characteristic of some epilepsies, particularly in their early stages, we excluded this term because in HPO release 2022-02-14 it is considered a type of Interictal EEG abnormality [HP:0025373] and we did not wish the presence of a normal EEG to imply an abnormal interictal EEG.                                                                                                                                                                                                                                |

## SUPPLEMENTARY FIGURES

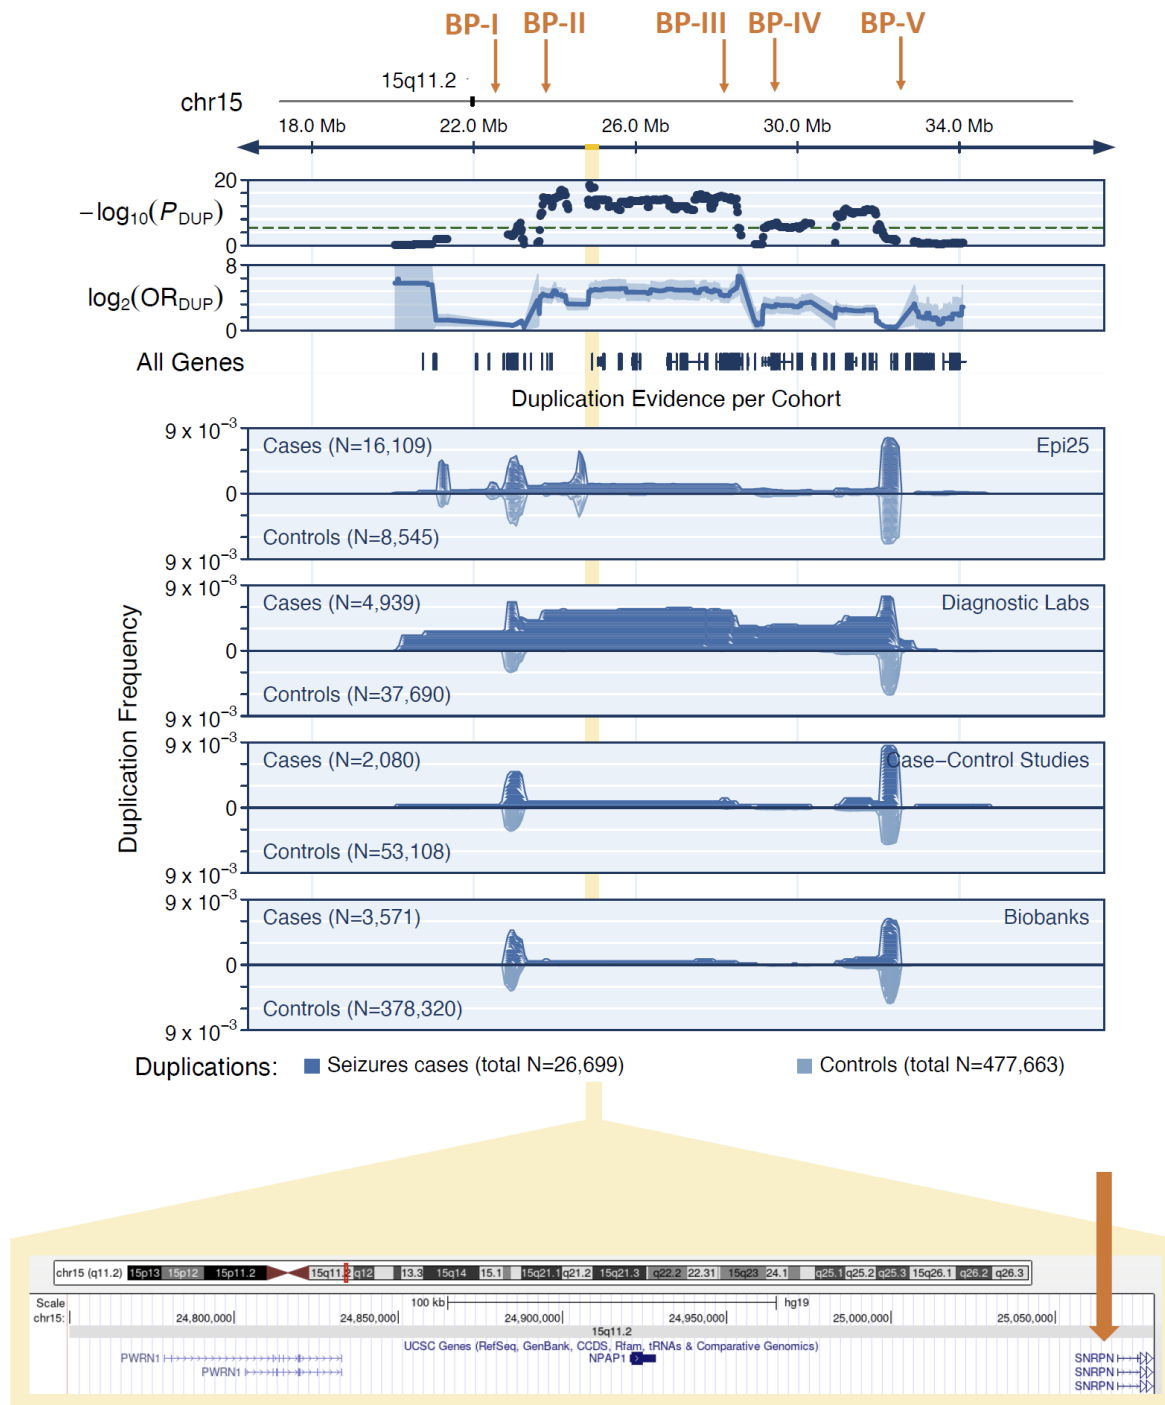

**Supplementary Fig. 1:** Regional CNV distribution plot and fine-mapping of the 15q11-q13 duplication. Known breakpoints are labeled BP-I to BP-V. The dashed line in the first plot represents the Bonferroni-corrected threshold for genome-wide significance,  $\alpha=3.74 \times 10^{-6}$ . The credible interval containing the causal element/ gene with 95% confidence is highlighted in yellow. The dark orange arrow in the lower plot points to the candidate gene of the interval.

**Supplementary Figure 2A)**

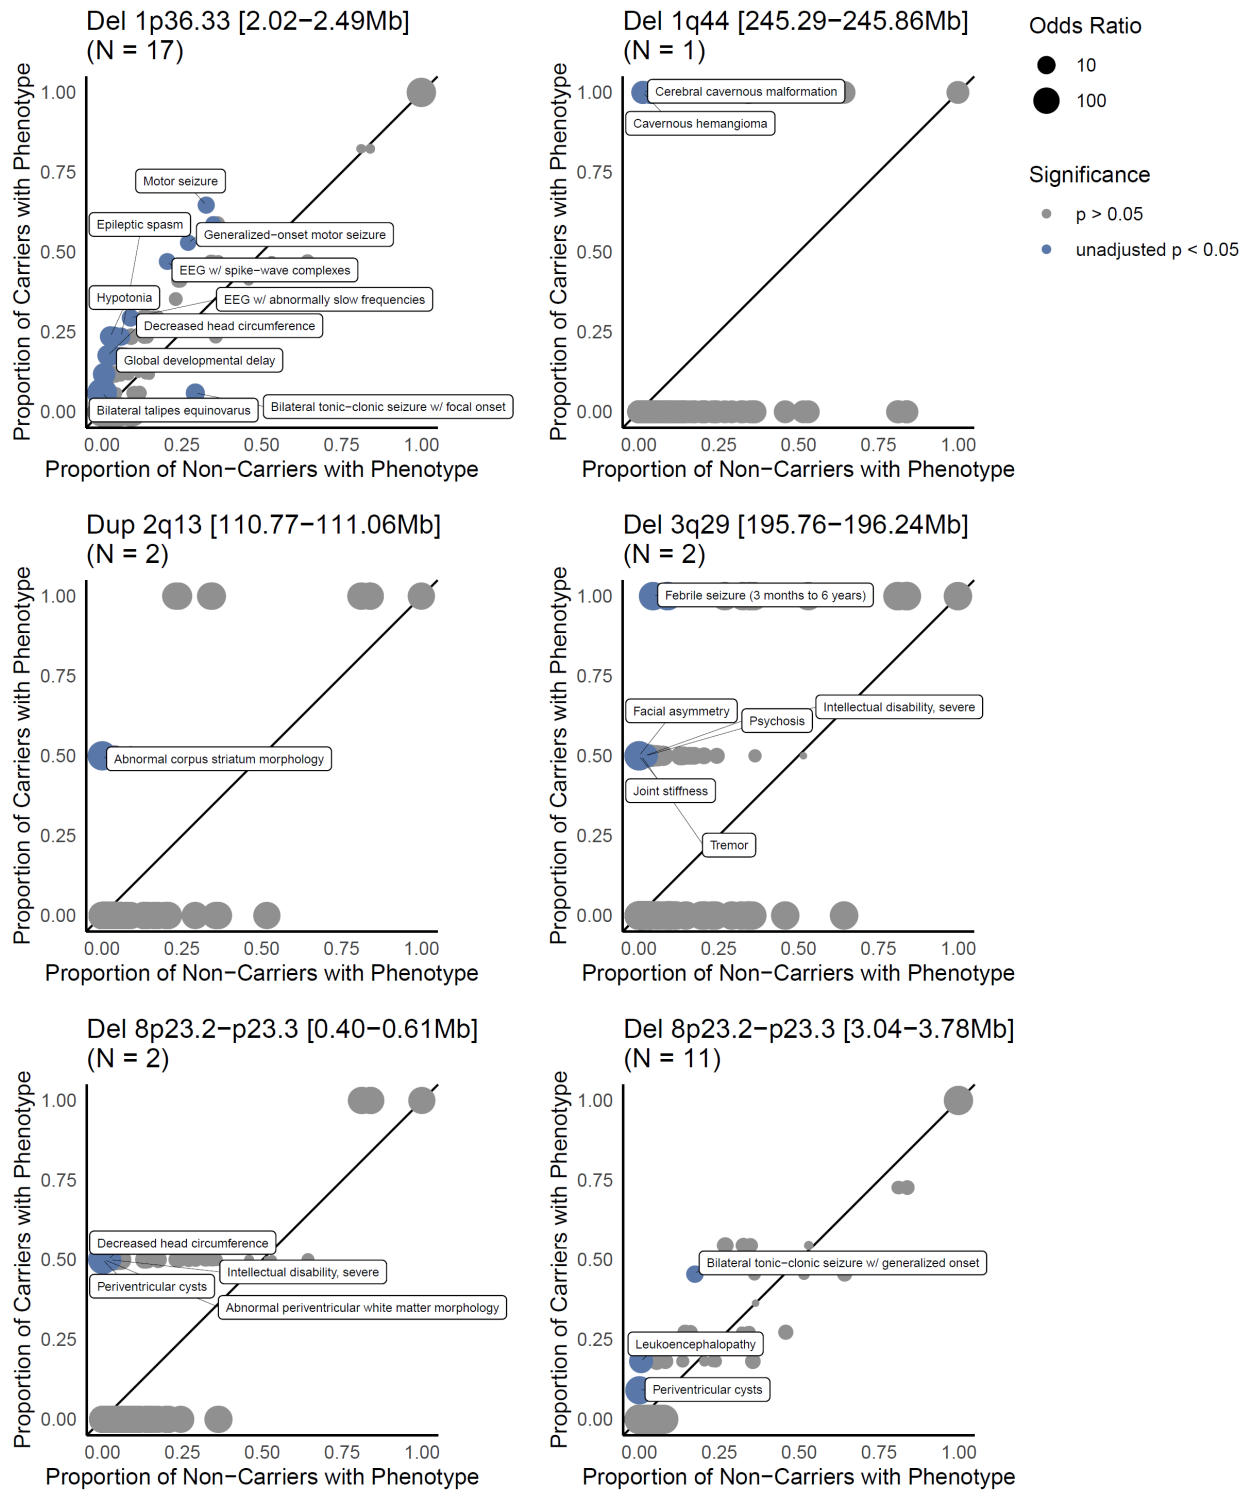

**Supplementary Figure 2B)**

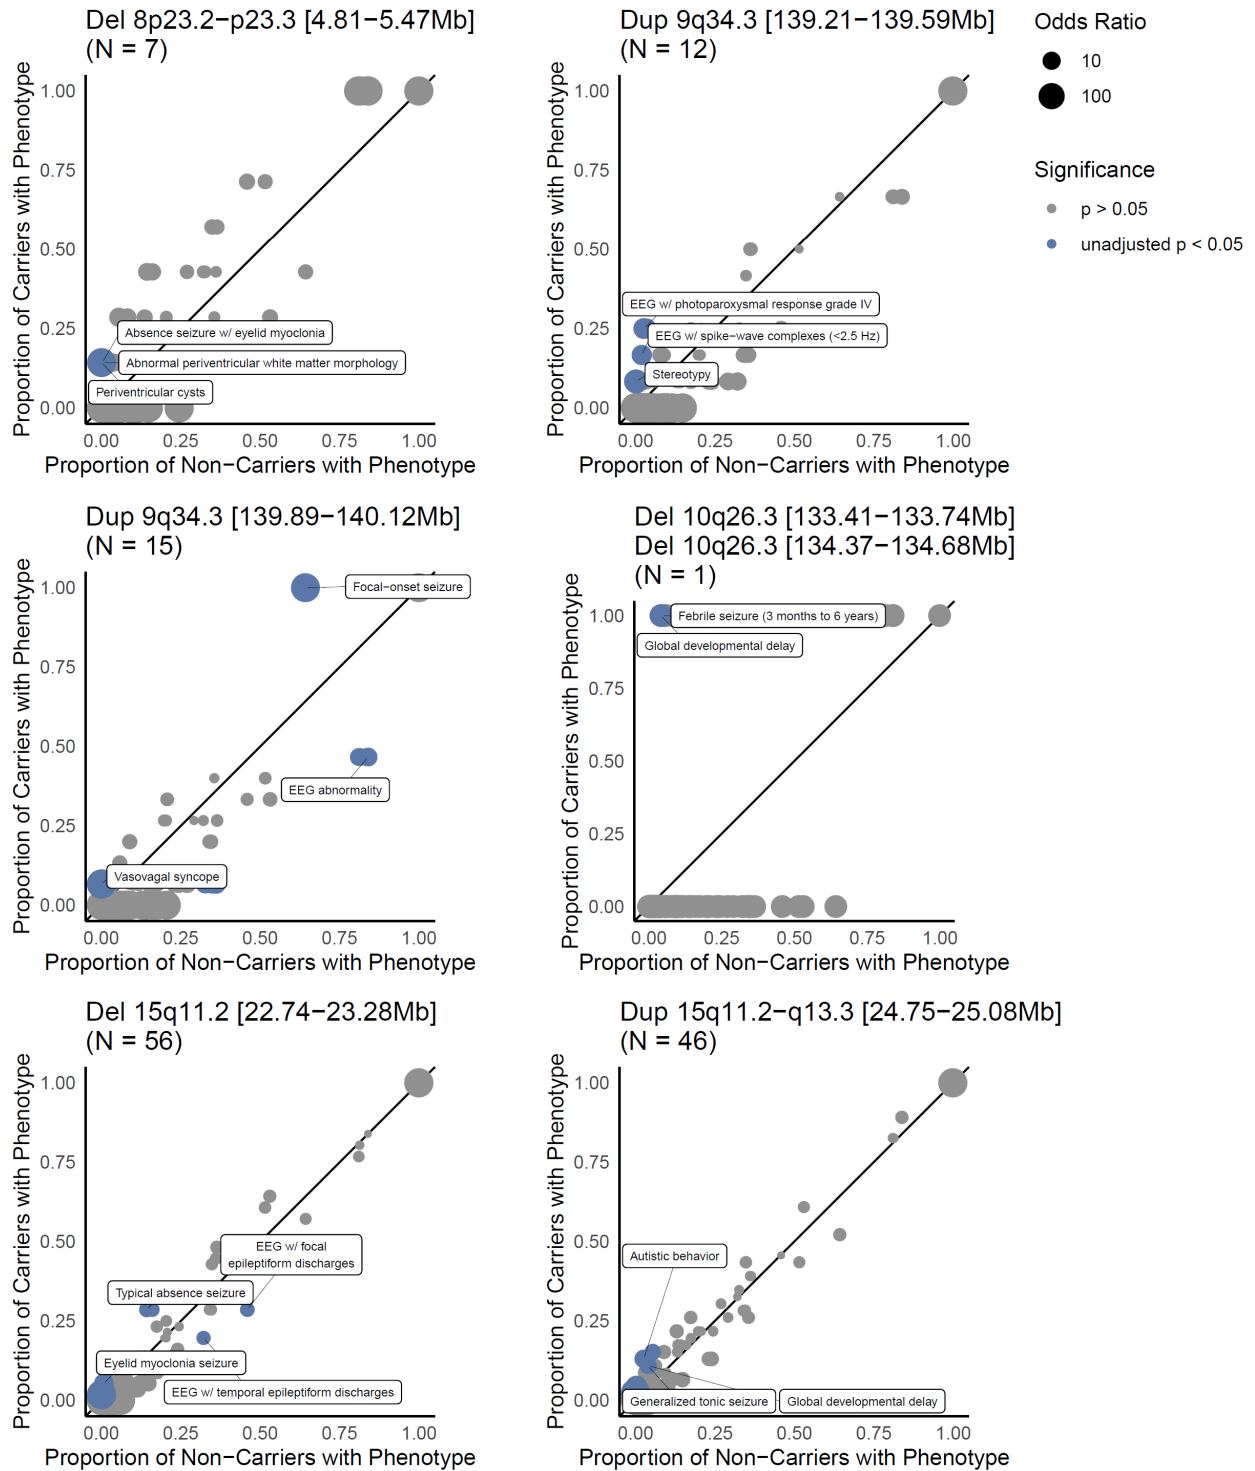



**Supplementary Figure 2C)**

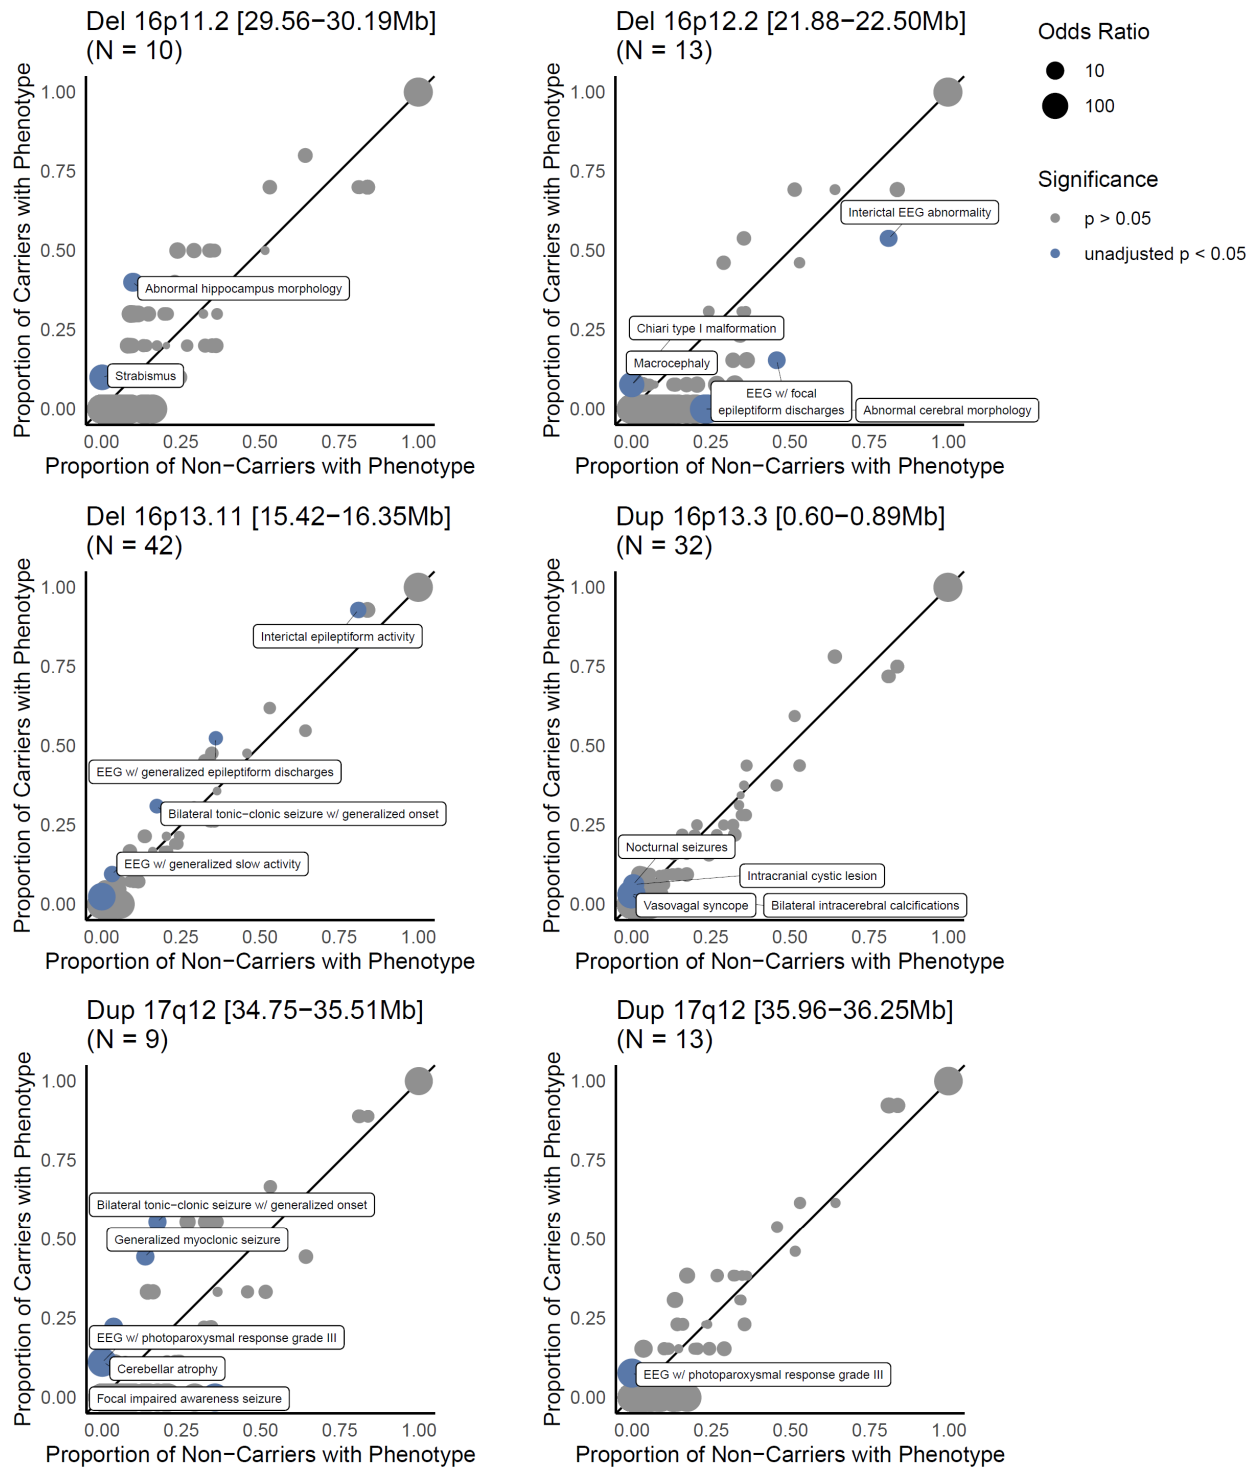

## Supplementary Figure 2D)

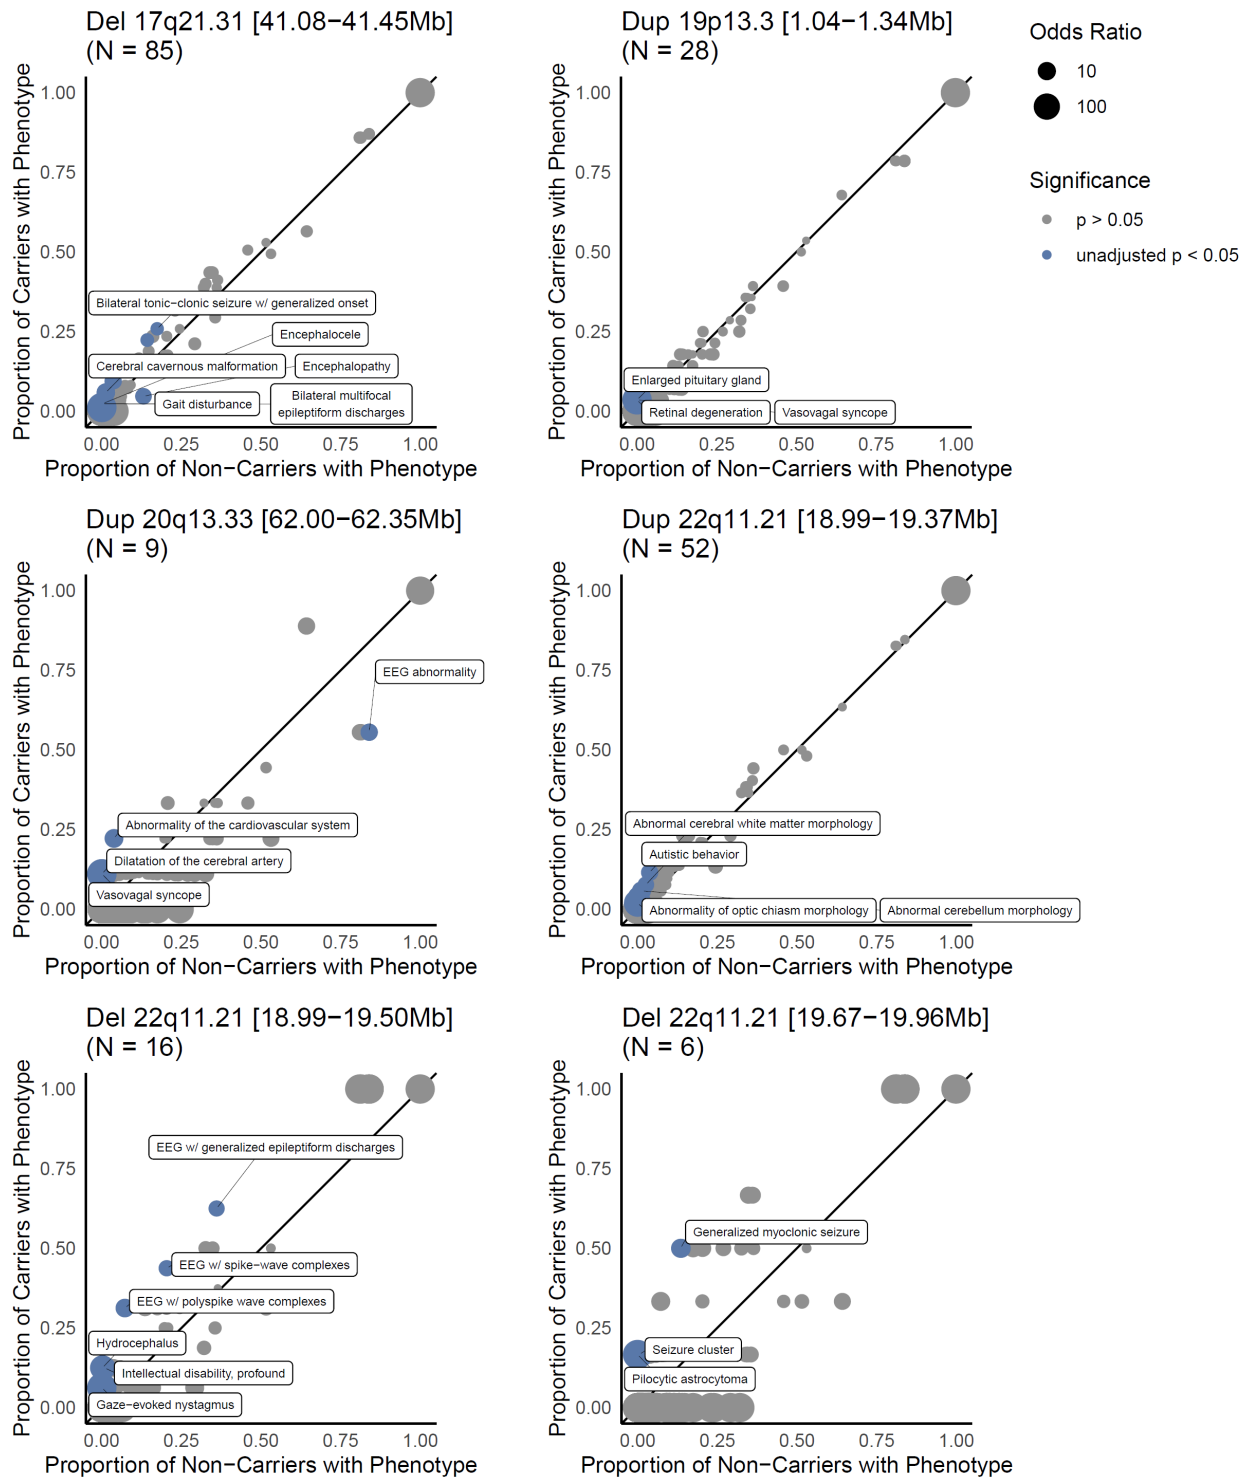

**Supplementary Figure 2E)**

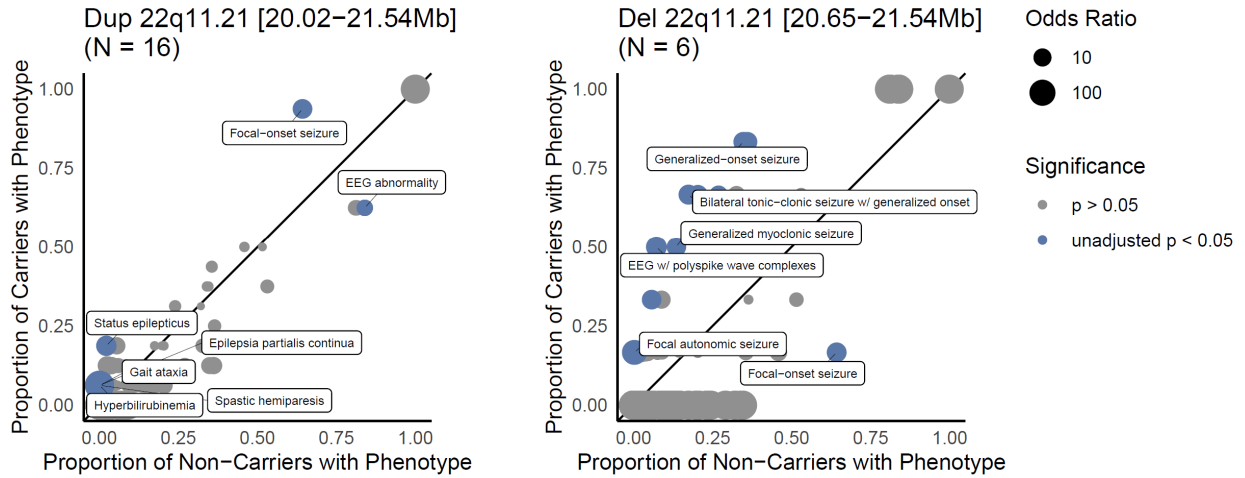

**Supplementary Fig. 2A-E: The enrichment and depletion of phenotypes among 10,880 Epi25 participants 60 carrying CNVs (complements Figure 2 of the main manuscript).** For each CNV, the proportion of carriers and non-carriers annotated with each HPO concept is plotted. Those above the diagonal were enriched among carriers, and those below were depleted. Odds ratios are represented by dot size. The selected phenotypes labeled were prioritized according to statistical evidence and clinical breadth. Full results for all associations reaching unadjusted  $P < 0.05$  are provided in **Supplementary Table 6**. EEG = electroencephalogram, w/ = with.

# Supplementary Figure 3A

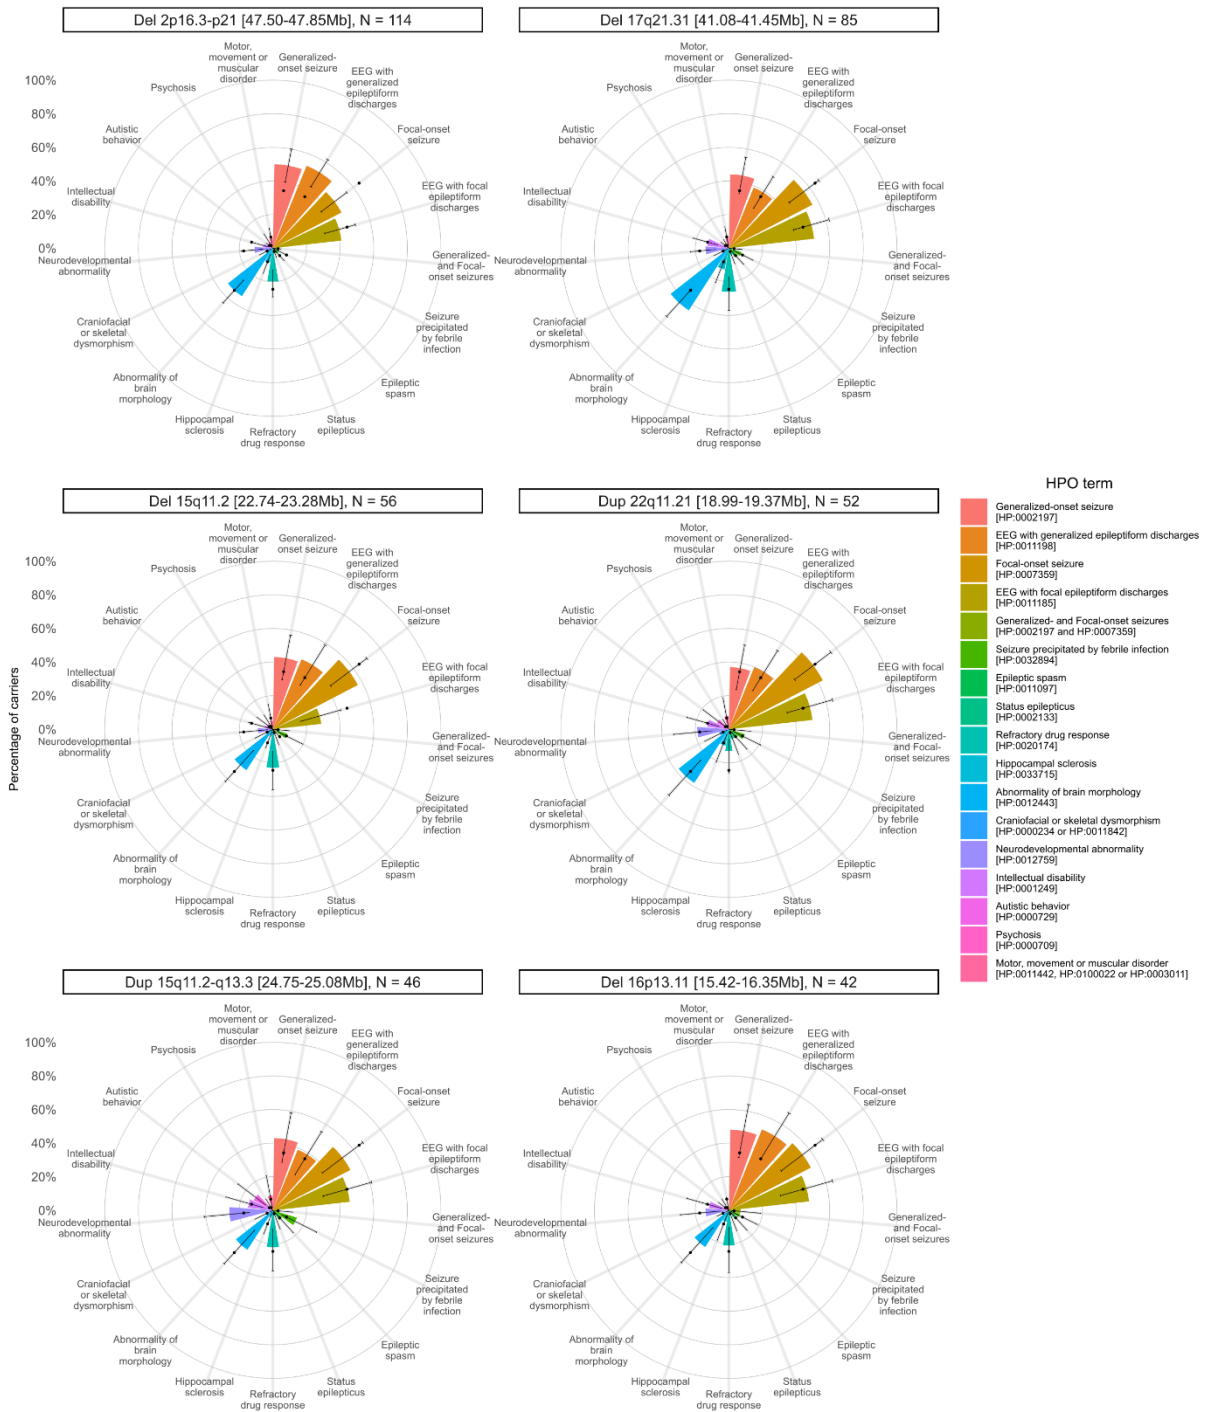

# Supplementary Figure 3B)

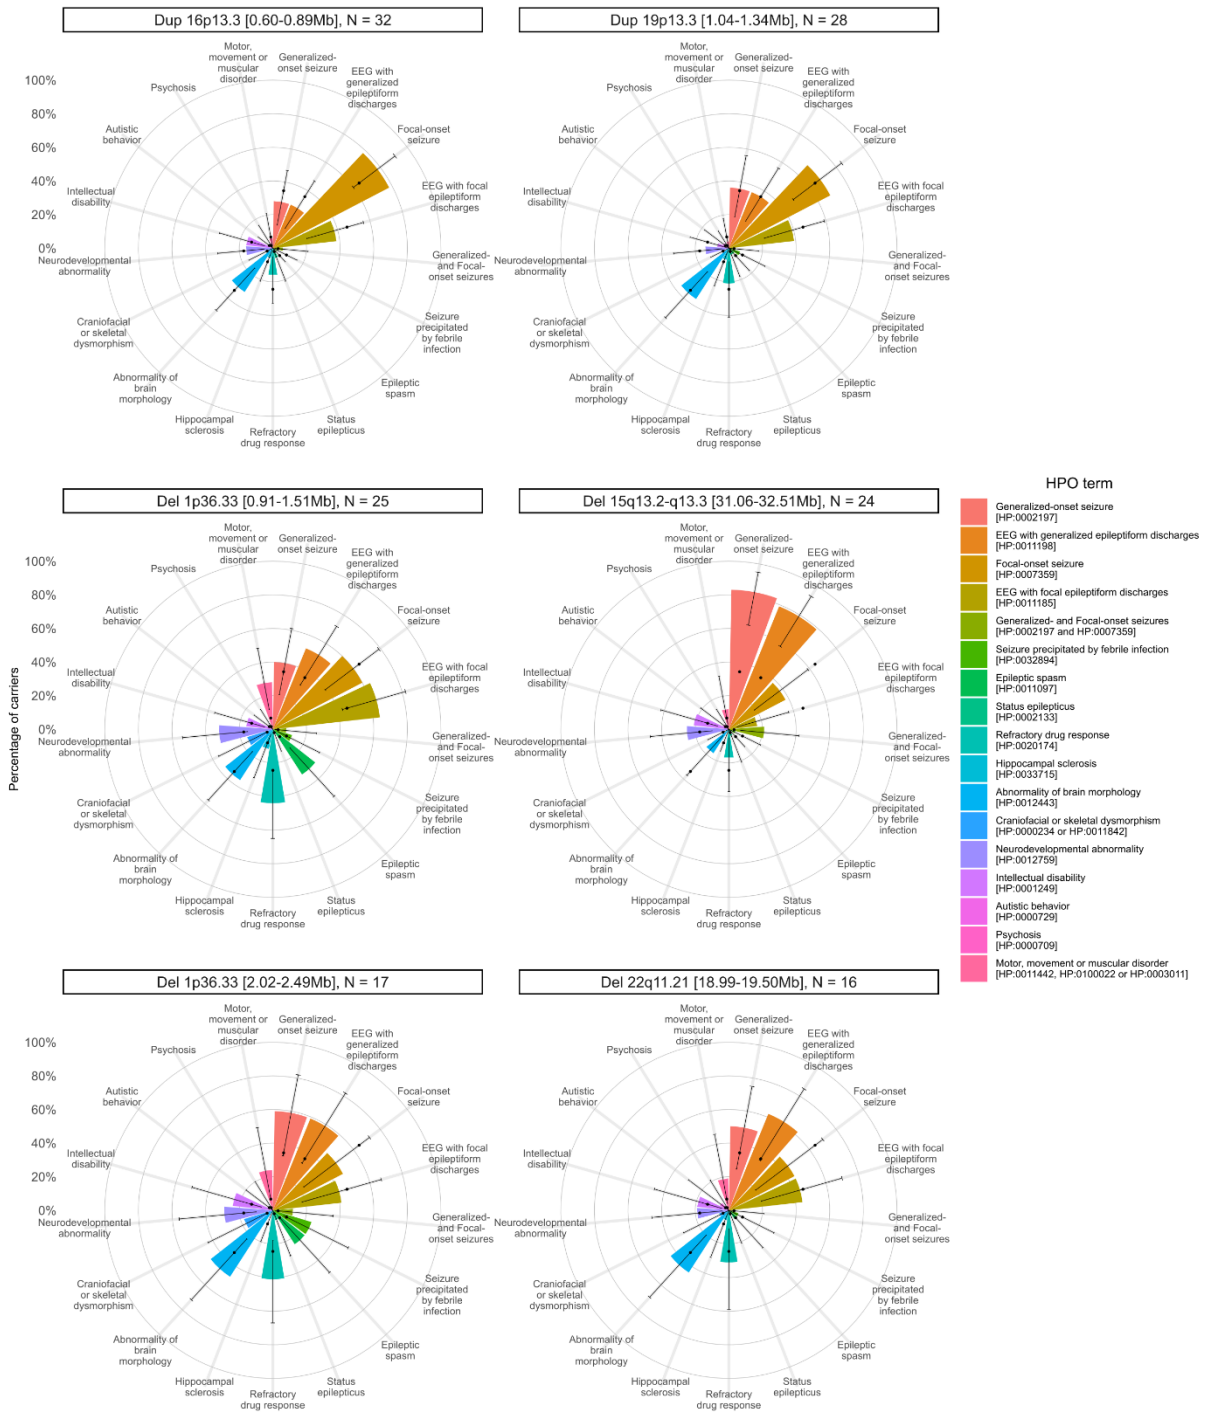

# Supplementary Figure 3C

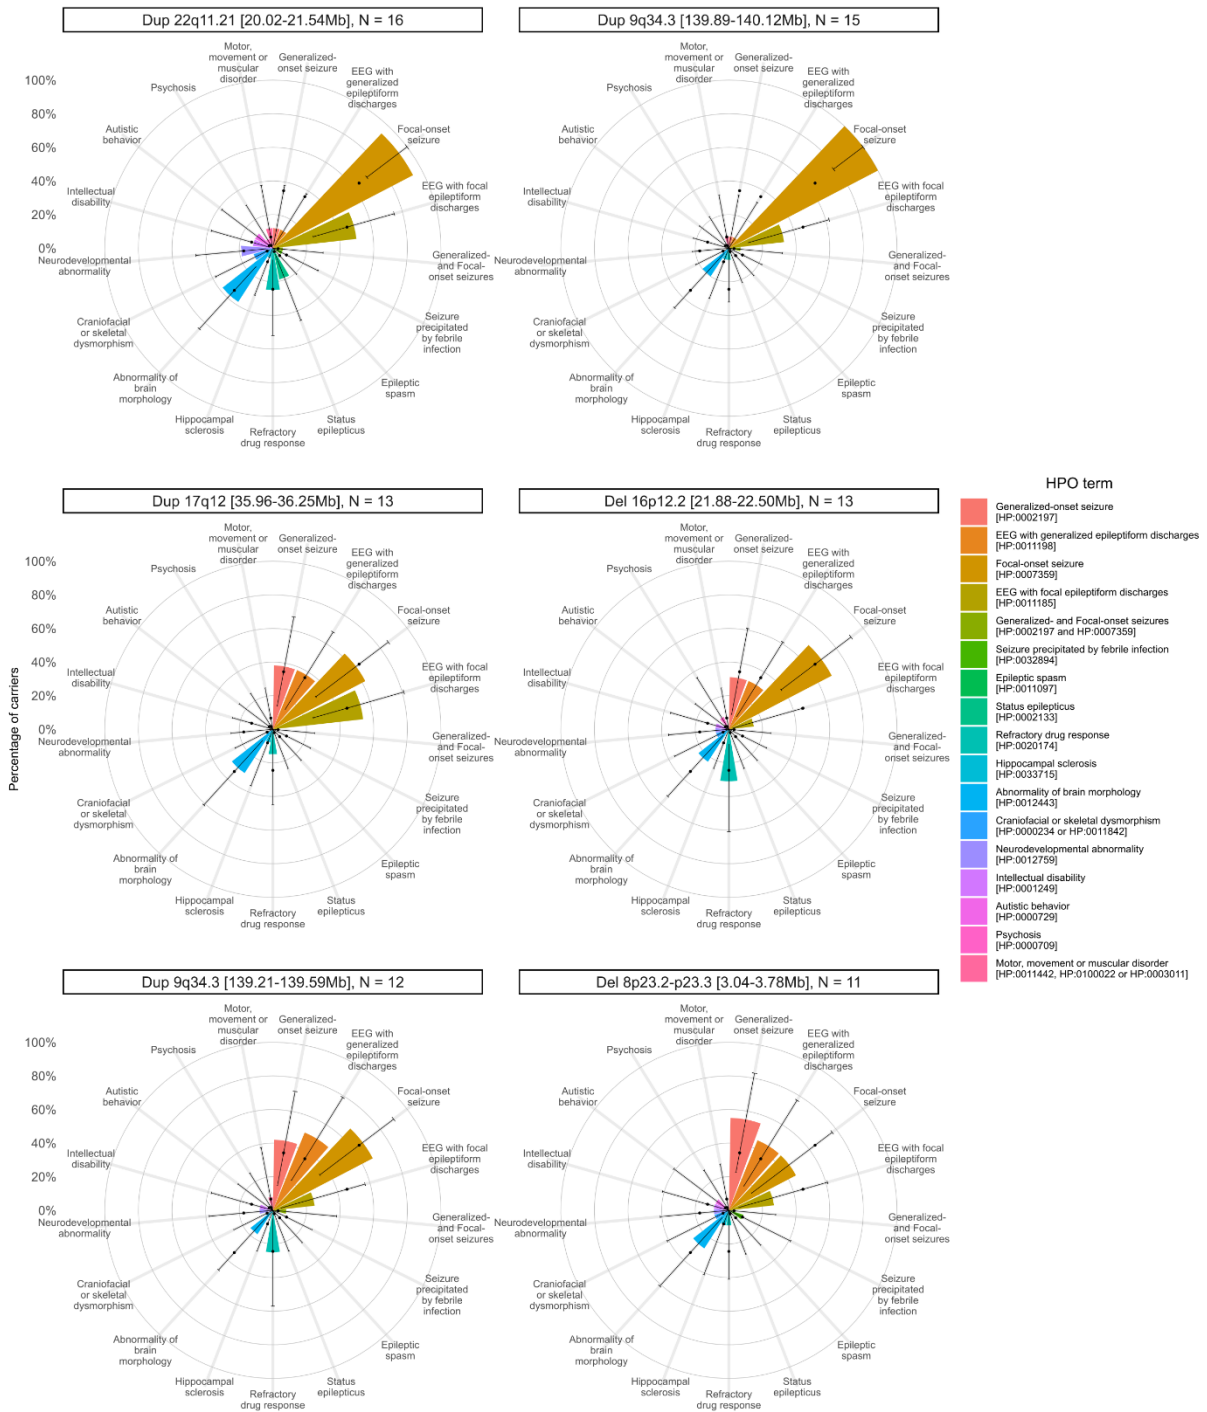

# Supplementary Figure 3D

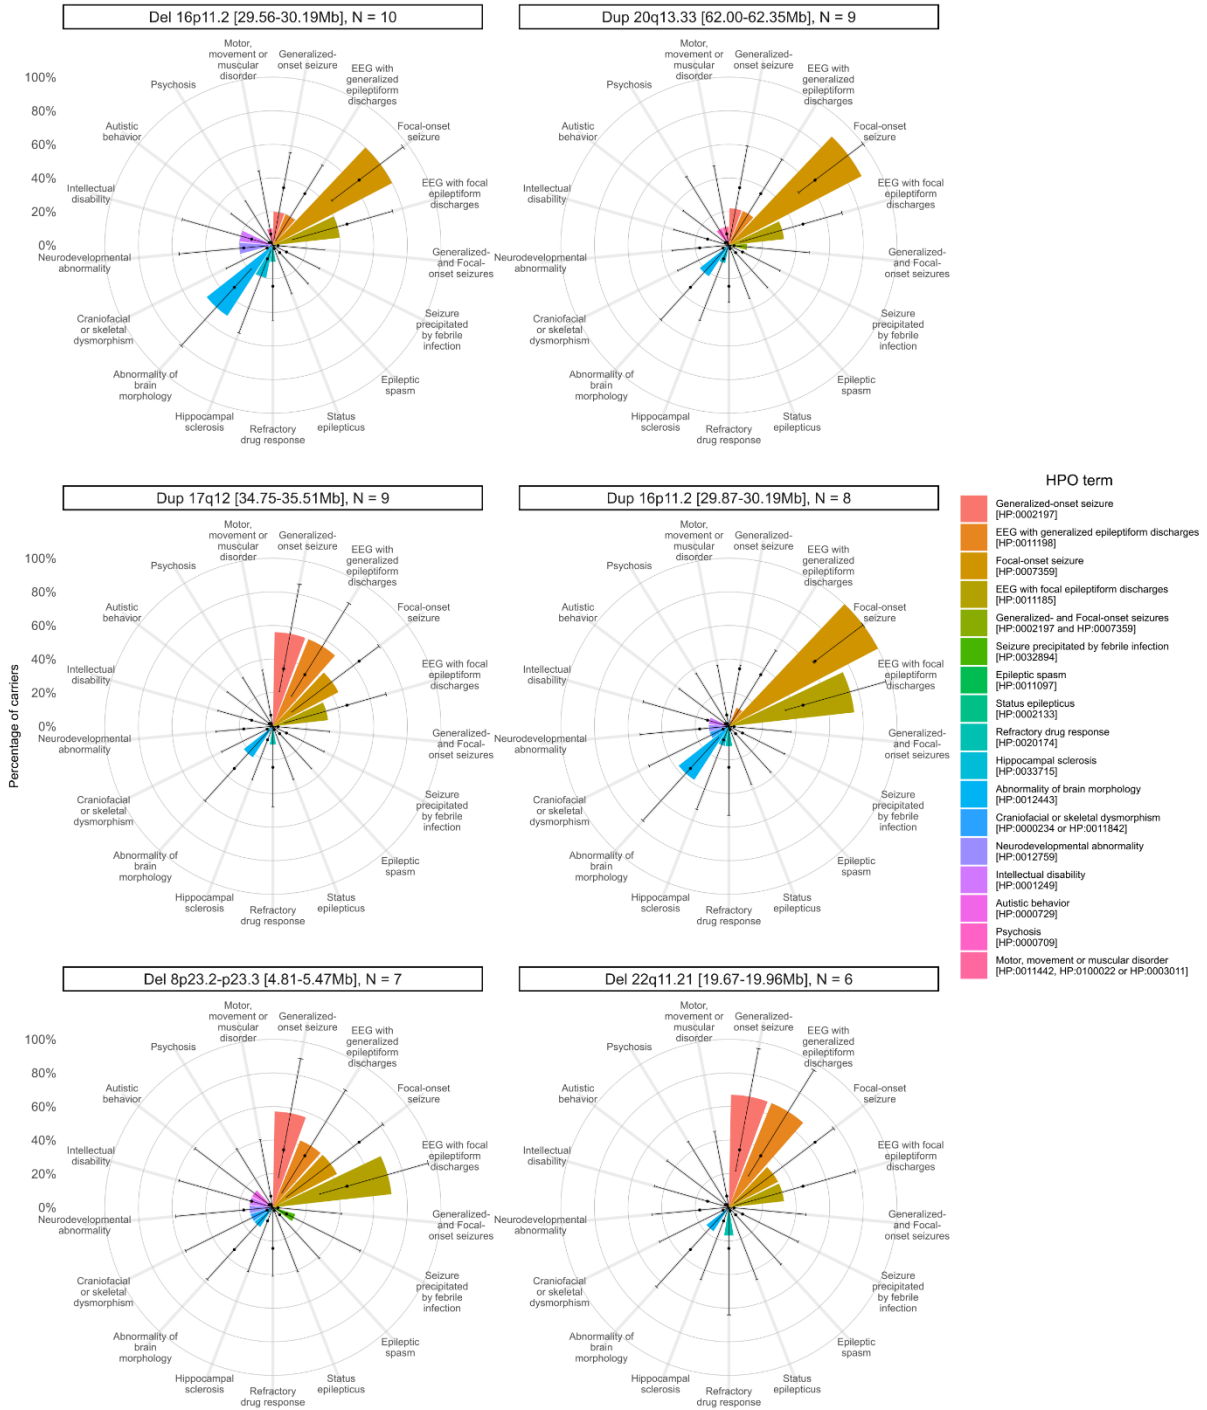



### Supplementary Figure 3E)

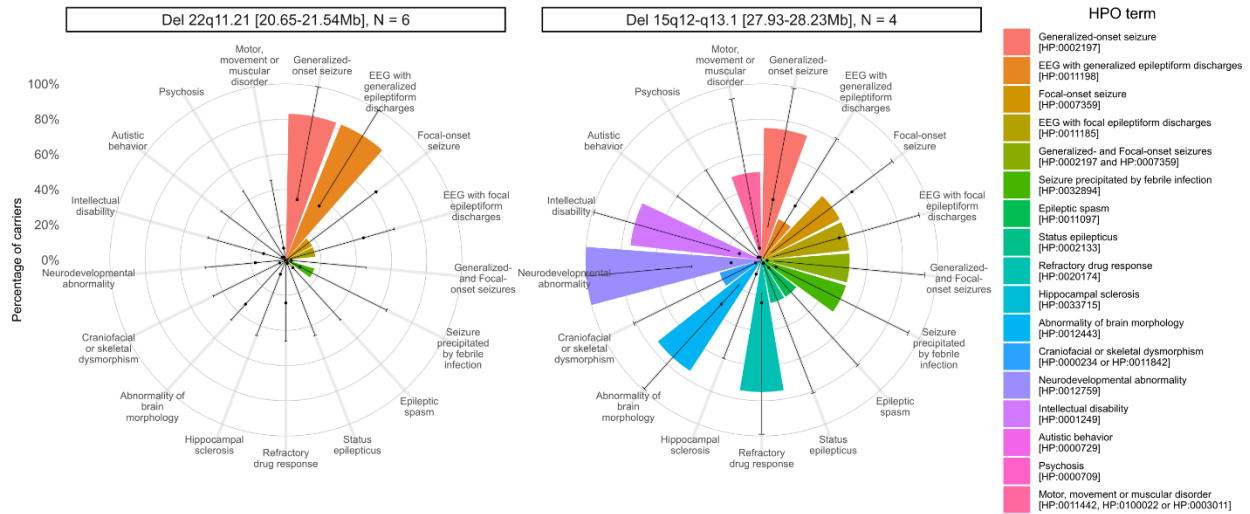

**Supplementary Figures 3A-E: Summaries of the clinical features of carriers of each CNV in the cohort of 64 10,880 Epi25 participants (including the panels from Fig. 3 of the main manuscript).** The percentage of carriers of the CNV with each broad phenotype is shown by the height of bars arranged on a polar axis, with two-sided 95% confidence interval error bars for these percentages derived from the binomial distribution using *stats::binom.test()*. For reference, dots indicate the percentage of the entire Phenomic cohort of 10,880 people with each broad phenotype (representing the prior probability of a person having the phenotype without genetic stratification). The binomial distribution two-sided 95% confidence intervals for a cohort size of 10,880 are no wider than 1.9% (not shown for clarity). "Craniofacial or skeletal dysmorphism" includes individuals with either "Abnormality of the head [HP:0000234]" (which excludes isolated brain structural abnormalities) or "Abnormal skeletal morphology [HP:0011842]". "Motor, movement or muscular disorder" includes individuals with any of "Abnormal central motor function [HP:0011442]", "Abnormality of movement [HP:0100022]" or "Abnormality of the musculature [HP:0003011]", but not "Motor delay [HP:0001270]", which is included in "Neurodevelopmental abnormality". While "Neurodevelopmental abnormality" includes those with "Intellectual disability", the latter is shown additionally as it is a neurodevelopmental outcome with particularly important socioeconomically important consequences. EEG = electroencephalogram.
