# Supplementary material for: Genome-wide identification and phenotypic characterization of seizure-associated copy number variations in 741,075 individuals
Source: PubMed Central journal article supplement (PMC10359300; doi:10.1038/s41467-023-39539-6), 2023-07-20
Supplement: 41467_2023_39539_MOESM3_ESM.pdf [file 41467_2023_39539_MOESM3_ESM.pdf]

## **Description of Additional Supplementary Files**

File Name: Supplementary Data 1

Description: List of candidate genes of lower confidence within the identified credible intervals.

File Name: Supplementary Data 2

Description: All genes inside the credible intervals are reported.

File Name: Supplementary Data 3

Description: All CNV-HPO associations with unadjusted two-sided  $P < 0.05$ .

File Name: Supplementary Data 4

Description: The proportion of 10,880 Epi25 participants annotated with each HPO concept after propagation.
